# Supplementary material for: Switched and unswitched memory B cells detected during SARS-CoV-2 convalescence correlate with limited symptom duration
Source: PubMed Central journal article supplement (PMC7843013; doi:10.1371/journal.pone.0244855), 2021-01-28
Supplement: pone.0244855.s001.pdf [file pone.0244855.s001.pdf]

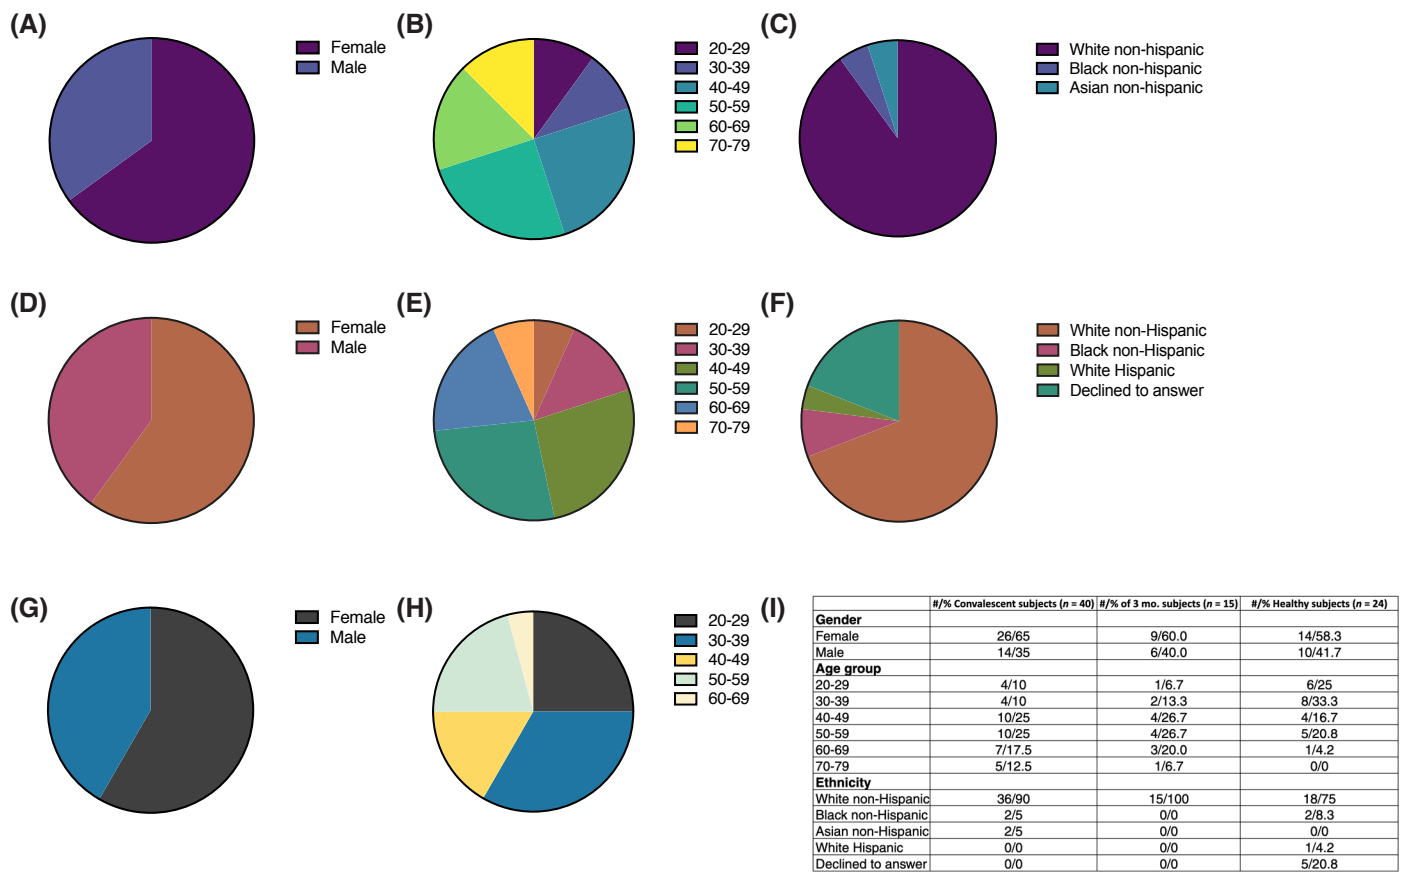

**S1 Fig. Demographic data.** (A-C) Distribution of (A) gender, (B) age, and (C) ethnicity among the convalescent plasma donor cohort ( $n = 40$ ). (D-F) Distribution of (D) gender, (E) age, and (F) ethnicity among healthy donors ( $n = 24$ ). (G-H) Distribution of (G) gender and (H) age among the subset convalescent plasma donor cohort ( $n = 15$ ) analyzed in fig 4, three months after initial visit. (I) Cumulative table of demographic data.
