# Supplementary material for: Switched and unswitched memory B cells detected during SARS-CoV-2 convalescence correlate with limited symptom duration
Source: PubMed Central journal article supplement (PMC7843013; doi:10.1371/journal.pone.0244855), 2021-01-28
Supplement: pone.0244855.s002.pdf [file pone.0244855.s002.pdf]

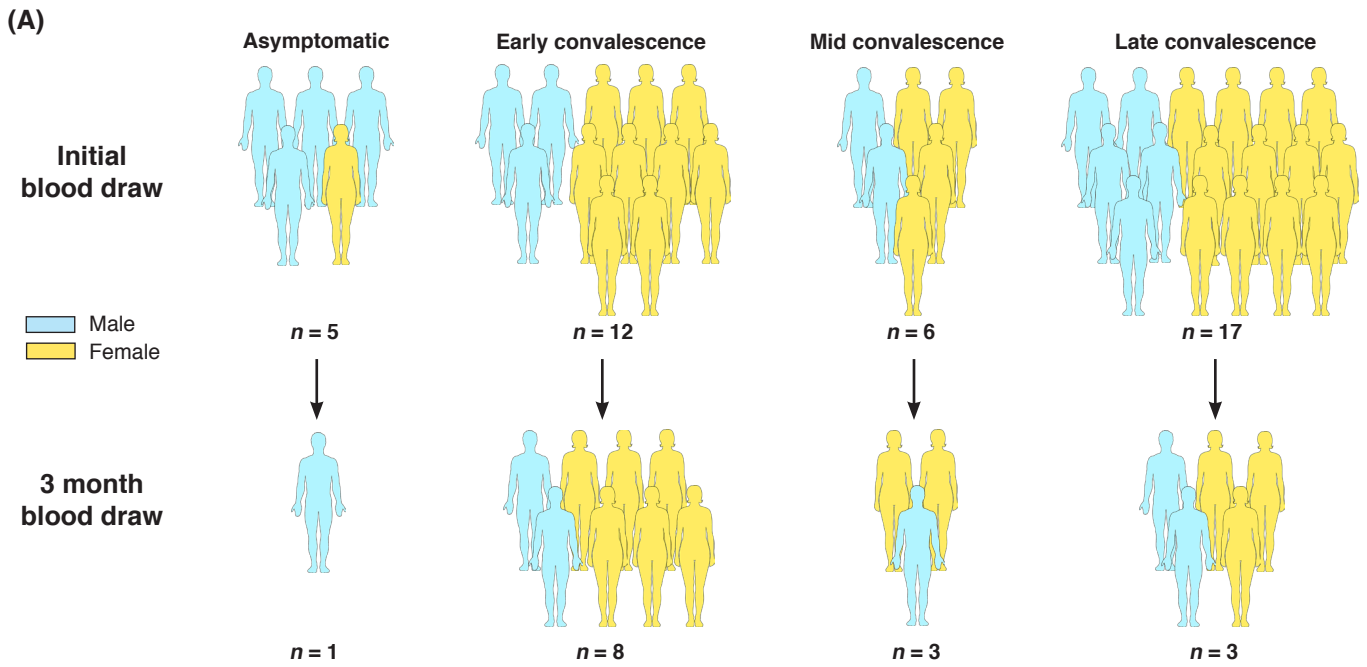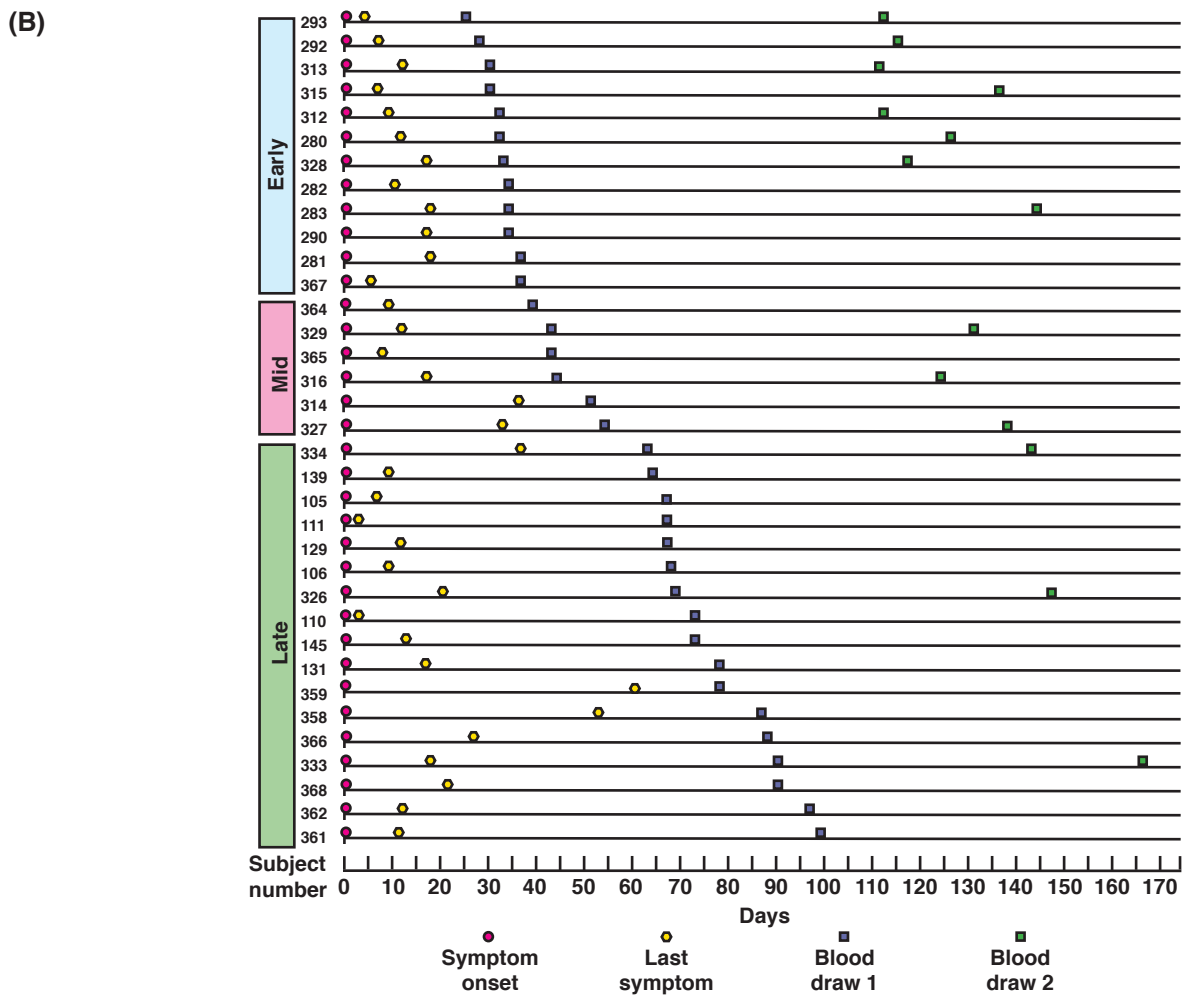

**S2 Fig. Study design and clinical data.** (A) Graphical representation of convalescent subject groupings and gender ( $n = 40$ ). All grouping and subset designations were done retrospectively. (B) Symptom and sampling timeline for symptomatic subjects ( $n = 35$ ), ordered by length of convalescence.
