# Supplementary material for: Switched and unswitched memory B cells detected during SARS-CoV-2 convalescence correlate with limited symptom duration
Source: PubMed Central journal article supplement (PMC7843013; doi:10.1371/journal.pone.0244855), 2021-01-28
Supplement: pone.0244855.s003.pdf [file pone.0244855.s003.pdf]

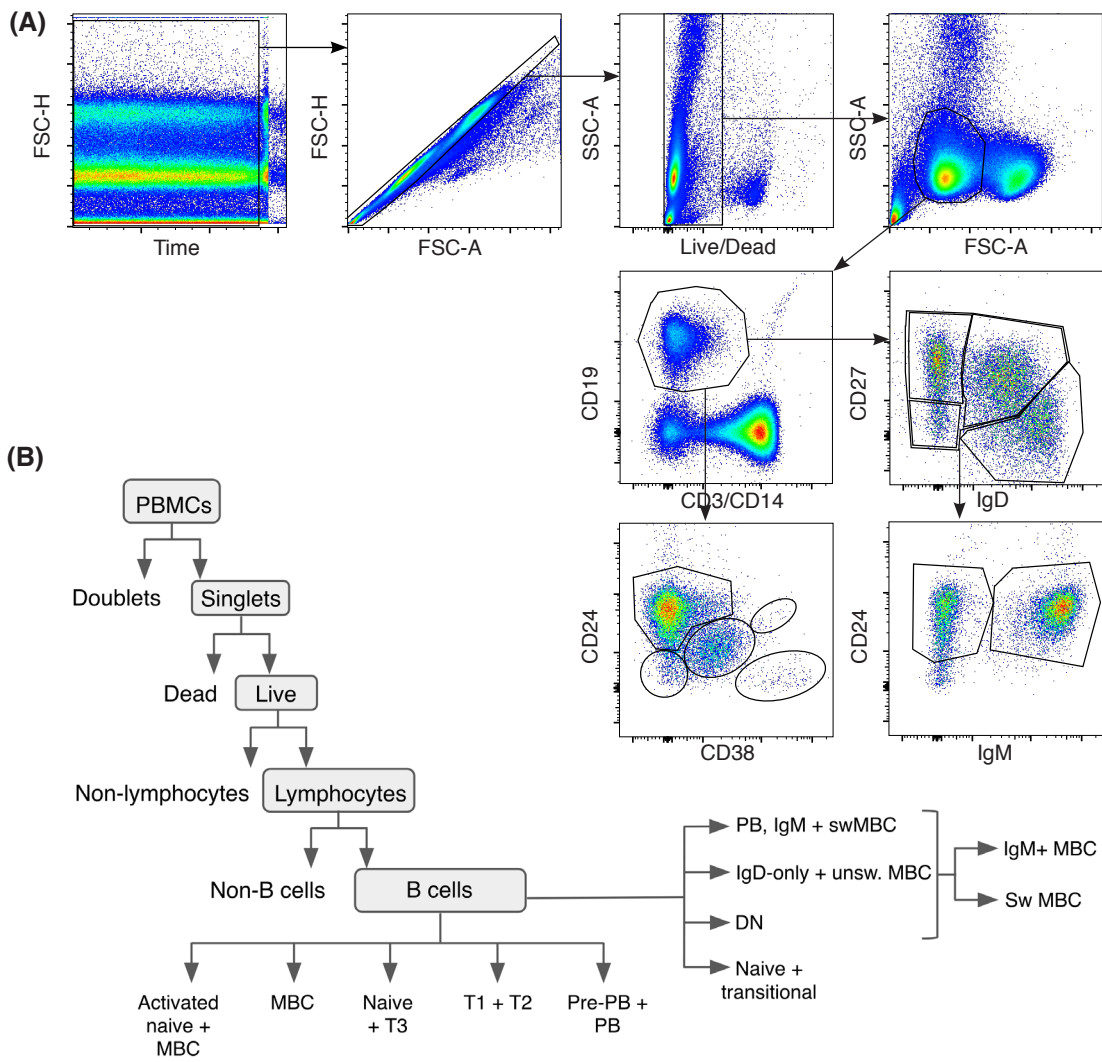

**S3 Fig. Flow cytometry gating strategies for B cell subset analysis.** (A) Representative plots demonstrating gating strategy for flow cytometric identification of B cell subsets. (B) Flow chart showing the dichotomy and subset discrimination used to assess B cell subsets from peripheral blood PBMCs.
