# Supplementary material for: Switched and unswitched memory B cells detected during SARS-CoV-2 convalescence correlate with limited symptom duration
Source: PubMed Central journal article supplement (PMC7843013; doi:10.1371/journal.pone.0244855), 2021-01-28
Supplement: pone.0244855.s004.pdf [file pone.0244855.s004.pdf]

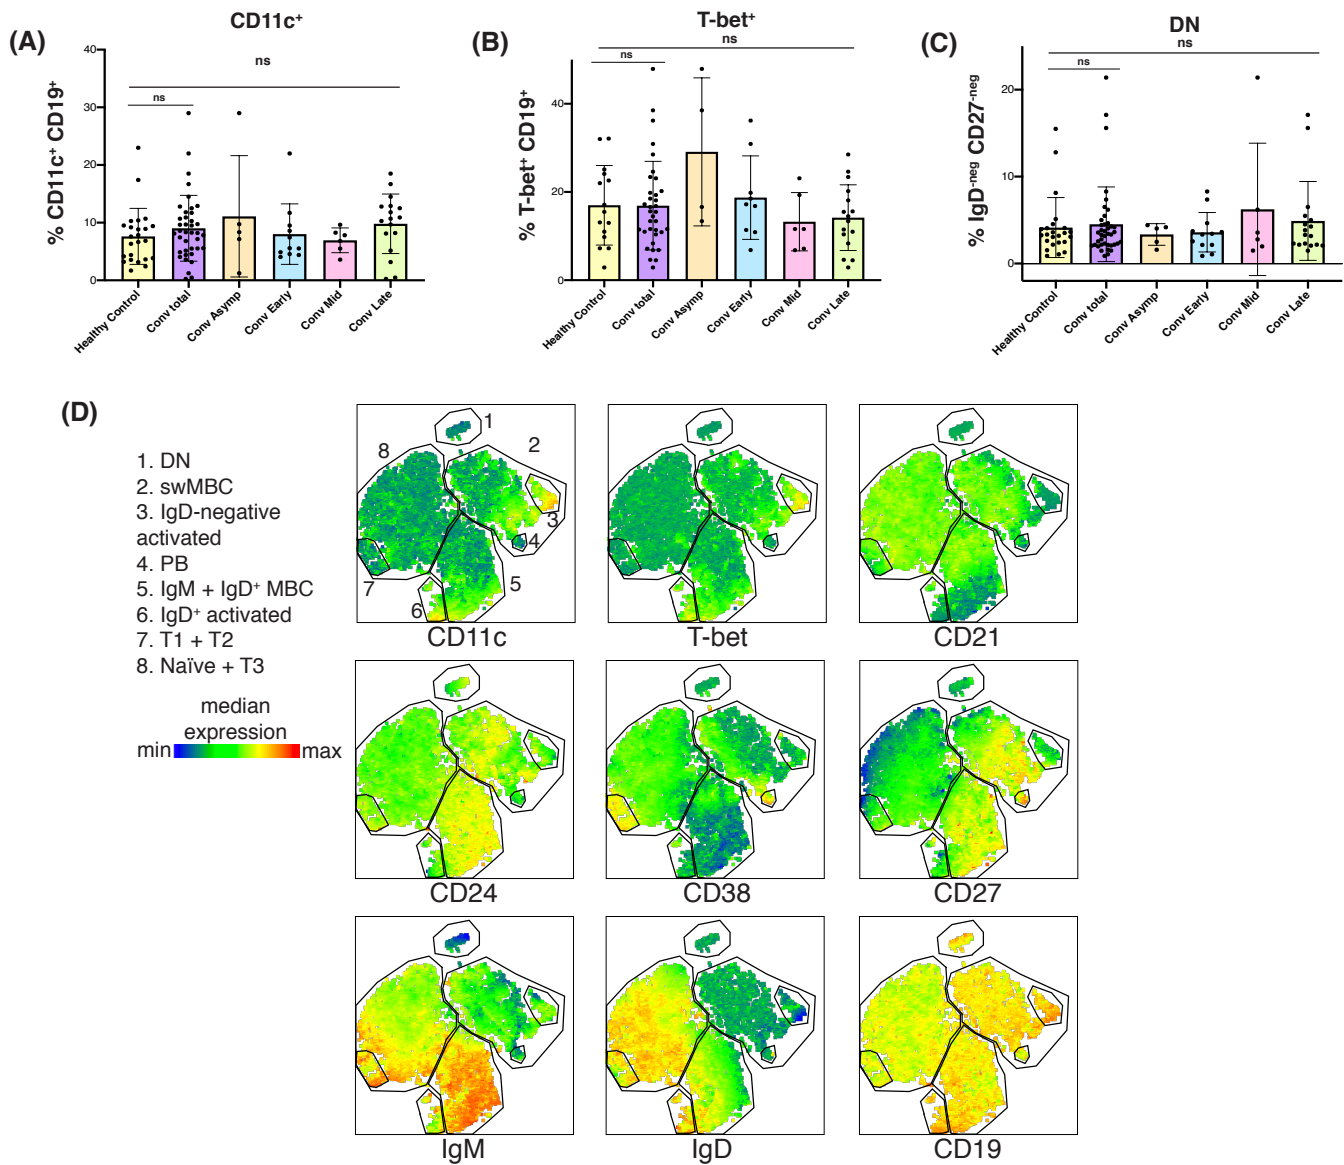

**S4 Fig. B cell subset and cluster analysis.** (A-C) Healthy and convalescent donor cell frequencies for (A) CD11c<sup>+</sup>, (B) T-bet<sup>+</sup>, and (C) DN subsets among viable CD19<sup>+</sup> lymphocytes. Bars represent mean  $\pm$  SD. Statistical analysis between each donor subgroup was done with non-parametric Kruskal-Wallis test with Dunn's correction for multiple comparisons. Adjusted  $p$  value was used to determine family-wise significance at  $\alpha = 0.05$ . Healthy control and total convalescent groups also compared by Mann-Whitney test with two-tailed  $p$  value,  $\alpha = 0.05$ . Healthy control  $n = 24$ , conv. total  $n = 40$ , asymp.  $n = 5$ , conv. early  $n = 12$ , conv. mid  $n = 6$ , conv. late  $n = 17$ , except for T-bet (B), where  $n = 4, 9, 6,$  and  $16$ , respectively, due to technical limitations. (D) tSNE representation of flow cytometry data sub-gated to highlight key clusters of viable CD19<sup>+</sup> lymphocytes from a representative convalescent donor with an enriched memory B cell subset. Heatmap overlay shows median expression for the target below each plot.
