# Supplementary material for: Switched and unswitched memory B cells detected during SARS-CoV-2 convalescence correlate with limited symptom duration
Source: PubMed Central journal article supplement (PMC7843013; doi:10.1371/journal.pone.0244855), 2021-01-28
Supplement: pone.0244855.s005.pdf [file pone.0244855.s005.pdf]

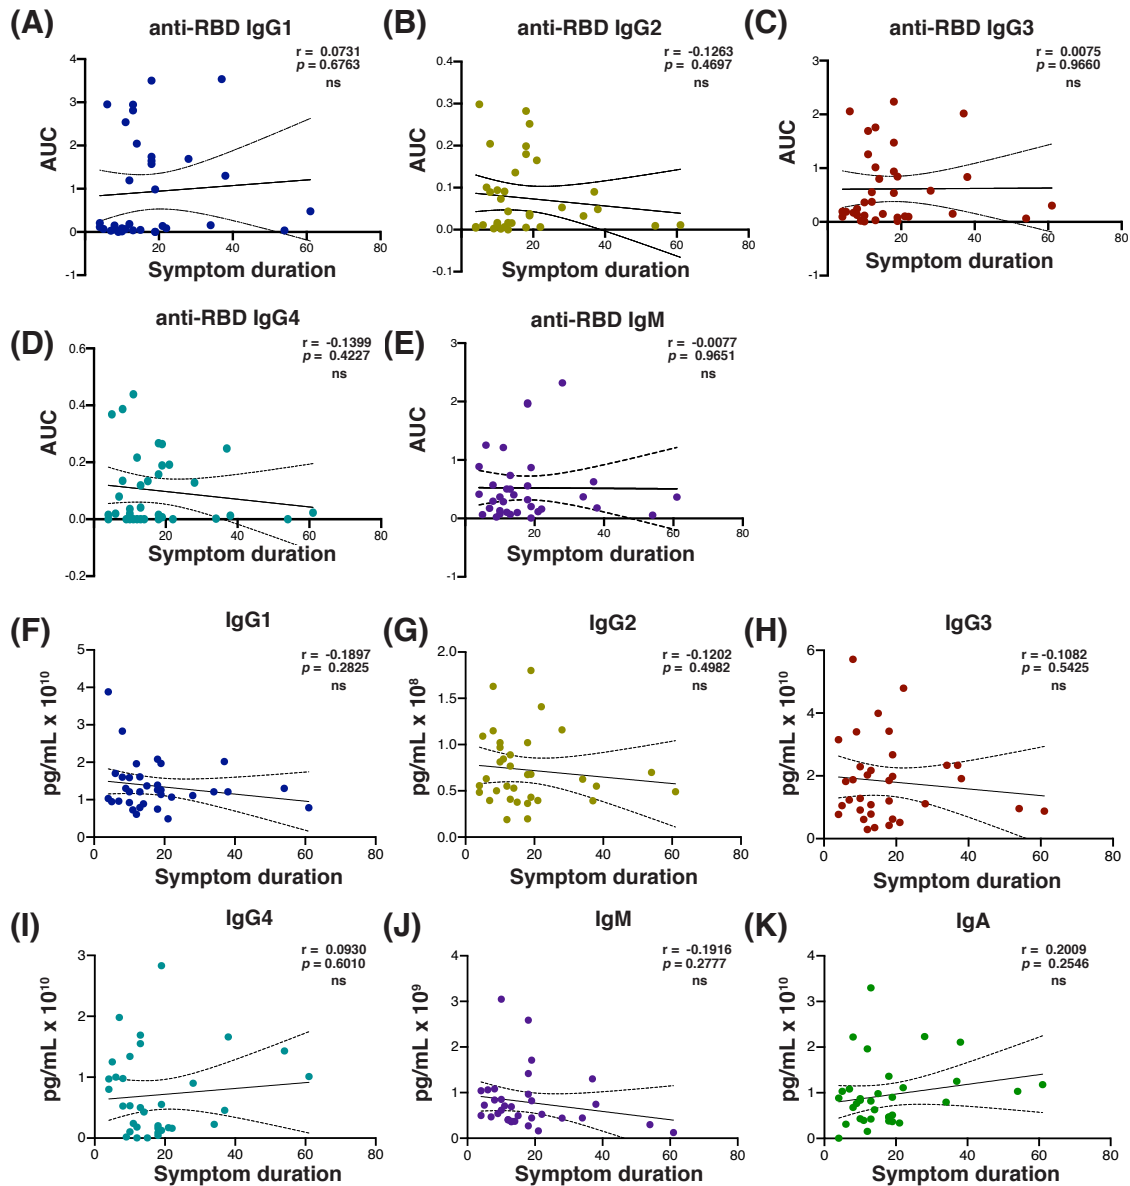

**S5 Fig. Symptom duration vs. anti-spike RBD-specific and total antibody levels in full cohort of convalescent plasma donors.**

(A-E) Scatterplot correlation of area under the curve for plasma anti-RBD absorbance vs. symptom duration for individual Ig isotypes and subclasses. (F-K) Scatterplot correlation of total plasma antibody concentration vs. symptom duration for individual Ig isotypes and subclasses. Pearson's correlation  $r$  value and 95% confidence intervals shown with two-tailed  $p$  value,  $\alpha = 0.05$ .  $n = 35$  (all symptomatic subjects) for all plots.
