# Supplementary material for: Switched and unswitched memory B cells detected during SARS-CoV-2 convalescence correlate with limited symptom duration
Source: PubMed Central journal article supplement (PMC7843013; doi:10.1371/journal.pone.0244855), 2021-01-28
Supplement: pone.0244855.s006.pdf [file pone.0244855.s006.pdf]

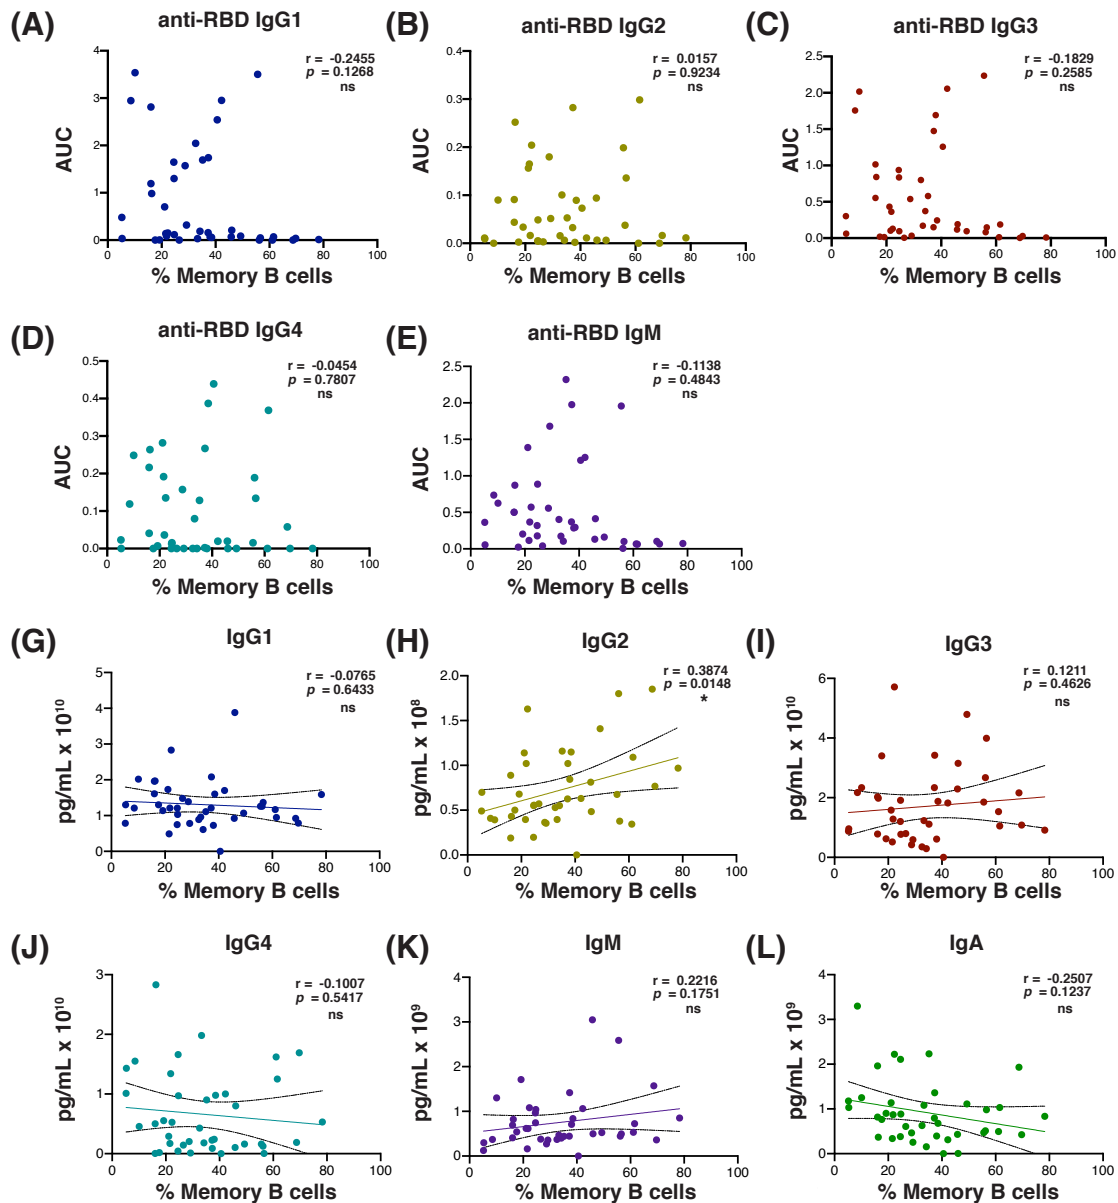

**S6 Fig. Memory B cell frequency vs. anti-RBD antibody and total immunoglobulin in full cohort of convalescent plasma donors.** (A-E) Scatterplot correlation of area under the curve for anti-RBD plasma antibody absorbance vs. memory B cell frequency for individual Ig isotypes and subclasses. (G-L) Scatterplot correlation of total plasma antibody concentration vs. memory B cell frequency from all convalescent subjects. Units reflect relative abundance of isotype, and were adjusted for graphical consistency. Pearson's correlation  $r$  value and 95% confidence intervals shown with two-tailed  $p$  value,  $\alpha = 0.05$ .  $n = 40$  for all anti-RBD plots,  $n = 39$  for total Ig plots (one asymptomatic subject was not tested).
