# Supplementary material for: Switched and unswitched memory B cells detected during SARS-CoV-2 convalescence correlate with limited symptom duration
Source: PubMed Central journal article supplement (PMC7843013; doi:10.1371/journal.pone.0244855), 2021-01-28
Supplement: pone.0244855.s007.pdf [file pone.0244855.s007.pdf]

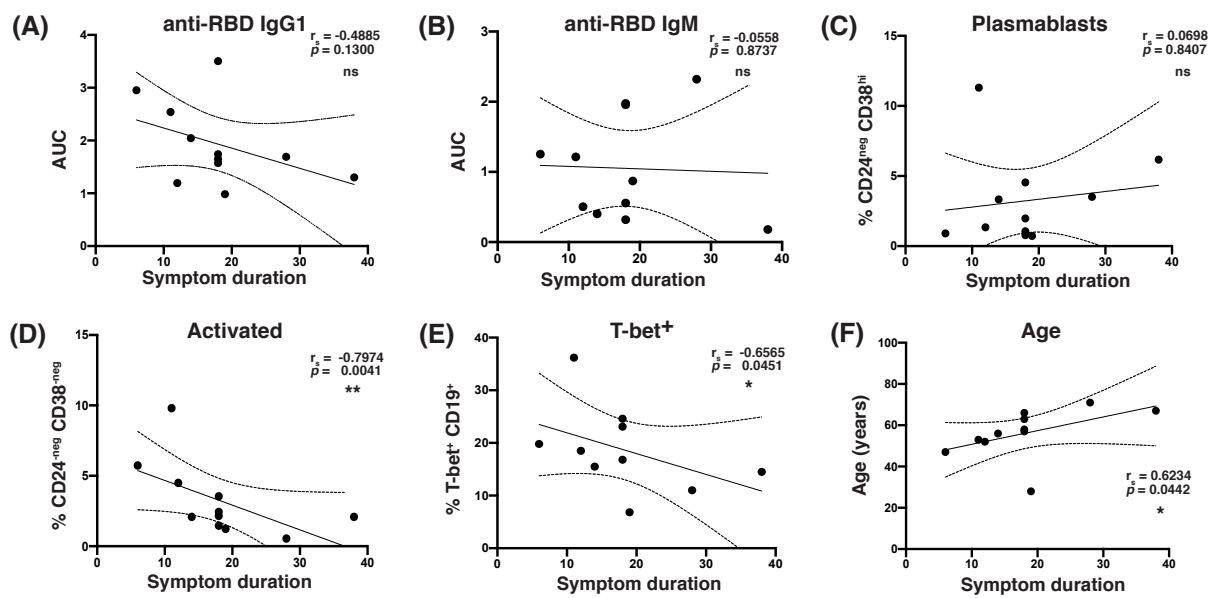

**S7 Fig. Symptom duration correlations in anti-RBD IgG1-producing convalescent plasma donors.** (A-B) Scatterplot correlation of area under the curve for plasma anti-RBD (A) IgG1 and (B) IgM absorbance vs. symptom duration. (C) Scatterplot correlation of symptom duration in days vs. frequency of (C) plasmablasts, (D) activated naive/memory, and (E) T-bet<sup>+</sup> cells among CD19<sup>+</sup> B cells. Scatterplot correlation of symptom duration vs. age in years.  $n = 11$  for all plots, circled in Fig 3A. Spearman's correlation  $r_s$  value and 95% confidence intervals shown with two-tailed  $p$  value,  $\alpha = 0.05$  for all analyses. Regression lines shown to demonstrate trend.
